# Supplementary material for: Dichotomy between the transcriptomic landscape of naturally versus accelerated aged murine hearts
Source: PubMed Central journal article supplement (PMC7235007; doi:10.1038/s41598-020-65115-9), 2020-05-18
Supplement: 41598_2020_65115_MOESM1_ESM.pdf [file 41598_2020_65115_MOESM1_ESM.pdf]

## **Supplementary information to:**

*Federica De Majo, Jana-Charlotte Hegenbarth, Frank Rühle, Christian Bär, Thomas Thum, Martine de Boer, Dirk J. Duncker, Blanche Schroen, Anne-Sophie Armand, Monika Stoll, Leon J. De Windt. Dichotomy between the transcriptomic landscape of naturally versus accelerated aged murine hearts.*

**Supplementary Table 1:** *Primers Real time PCR*

**Supplementary Table 2:** *Differentially expressed lncRNAs and their neighbouring genes in naturally aged 104 week-old mice*

**Supplementary Table 3:** *Top 50 differentially expressed lncRNAs and neighbouring genes in Harlequin mice*

**Supplementary Table 1. Primers Real-time PCR**

---

|             |                       |
|-------------|-----------------------|
| Fam124b FWD | CTTGAACGGCTGCTTGAGAG  |
| Fam124b RV  | CTTTGAACCTCCGACTCCTG  |
| Acsn5 FWD   | CACACACAGCCACCACCT    |
| Acsn5 RV    | TCCACACATCCAACACATCA  |
| Ano5 FWD    | ATTCTCCCTCCTCCTCCTGT  |
| Ano5 RV     | ACCCACATCCTCCCTTTAGC  |
| Rab6b FWD   | CTGCTGGGCAAGAGAGGTT   |
| Rab6b RV    | GTCTGCTGGAAGGAGTTGAGA |
| Fmn1 FWD    | AGCAAAGCAACCAGAAGCAG  |
| Fmn1 RV     | GTGGAGGAATGAGAGGTGGA  |
| Gm36670 FWD | CTGGCGACTTCTGCTGCTA   |
| Gm36670 RV  | ATTCCTCCCGTGCTTATCA   |
| Gm39465 FWD | GCCCTGAGTTTGGATTGC    |
| Gm39465 RV  | CCTGGAGTTCGCTGGTTC    |
| Xist FWD    | TCAGGATTCAAGTGGCTCTG  |
| Xist RV     | TCTTCTTTGGGTTGTCAGCA  |
| Eprn FWD    | TAGTCCAGAGGATGGGCAAC  |
| Eprn RV     | CACCAGAGGTAGTGGGAAGG  |
| Nppa FWD    | TCTTCCTCGTCTTGGCCTTT  |
| Nppa RV     | CCAGGTGGTCTAGCAGGTTC  |
| Nppb FWD    | TGGGAGGTCACCTCCTATCCT |
| Nppb RV     | GGCCATTTCTCCGACTTT    |
| L7 FWD      | GAAGCTCATCTATGAGAAGGC |
| L7 RV       | AAGACGAAGGAGCTGCAGAAC |

---

**Supplementary Table 2. Differentially expressed lncRNAs and their neighbouring genes in naturally aged 104 week old mice.**

| <b>MGI Symbol</b> | <b>Ensembl ID</b>  | <b>Locus</b>                  | <b>Genes (1,000,000bp)</b>                                                                                                                                                                                  |
|-------------------|--------------------|-------------------------------|-------------------------------------------------------------------------------------------------------------------------------------------------------------------------------------------------------------|
| Gm45159           | ENSMUSG00000109125 | Chr7:90,887,072-90,940,052    | Dlg2, Syt12, Picalm, eed, Hikeshi, Ccdc89, Crebzf, Tmem126a, Tmem126b, Ccdc83                                                                                                                               |
| Gm43913           | ENSMUSG00000108258 | Chr6:148,915,215-148,920,535  | Sinhcaf, Dennd5b, Etfbkmt, Amn1, Resf1, Bicd1, Caprin2, Ipo8, Tmtc1, ERgic2, Far2                                                                                                                           |
| Gm36670           | ENSMUSG00000109696 | Chr8: 91,974,095-91,991,869   | Irx5, Irx6, , Mmp2, Lpcat2, Capms2, Slc6a2, Irx3, Fto, Rpgrip1l, Aktip, Rb12, Chc9                                                                                                                          |
| Gm39465           | ENSMUSG00000111389 | Chr9:122,029,509-122,051,508  | Snrk, Ano10, Abhd5, Topazi, Tcaim, Zfp445, Zkscan7, Zfp105, Kif15, Tmem42, Tgm4, Pomgnt2, Gask1a, Ackr2, Cyp8b1, Higd1a, Ccdc13, Klh40, Hhat1, Nktr, Ss1812, Zfp651, Sec22c, Vipr1, Lyz14, Cck, Trak1, Ulk4 |
| Gm43332           | ENSMUSG00000107313 | Chr5:149,183,183-149,184,226  | Uspli, Alox5ap, Medag, TEx26, Wdr95, Hsph1, B3gltc, Rxfp2, Hmgb1, Katnali, Ubl3, Slc7a1, Mtus2                                                                                                              |
| 2900052N01Rik     | ENSMUSG00000099696 | Chr9:46,913,603-46,927,366    | Cadm1, Apoa5, Bud13, Zpr1, Apoa4, Apoc3, Apoa1, Pafah1b2, Sidt2, Tagln, Pcsk7                                                                                                                               |
| Gm36161           | ENSMUSG00000114608 | Chr13:120,016,880-120,018,215 | AF067961, BC147527, Tcstv3, Tcstv1, D13Ert608e, AF067063, Zfp131, Nim1k, Hmgcs1, Cc128, Tmem267, Paip1, Nnt                                                                                                 |
| Gm16685           | ENSMUSG00000097804 | Chr3:7,612,705-7,690,001      | Stmn2, Hey1, Il7, Zc2hc1a, Pkia                                                                                                                                                                             |
| Gm26870           | ENSMUSG00000097312 | chr9:3,017,875-3,038,310      | Alkbh8, Cwf1912, Gucy1a2                                                                                                                                                                                    |
| Gm15743           | ENSMUSG00000086645 | Chr16:31,427,876-31,429,776   | Bdh1, Dlg1, Melf, Pigz, Ncbp2, Senp5, Pak2, Pigx, Cep19, Nrros, Bex6, Fbxo45, Wdr53, Smco1, Rnf168, Ubxn7, Tm4sf19, Tctex1d2, Apod, Ppp1r2, Acp2, Xxylt1, Fam43a, Lsg1, Tmem44                              |
| 2310016D03Rik     | ENSMUSG00000102098 | Chr12:30,410,559-30,467,358   | Tmem18, Alka12, Acp1 Sh3yli, Fam110c, Lamb1, Dld, Slc26a3, Sntg2, Tpo, Pxdn, Myt1l                                                                                                                          |
| Gm43913           | ENSMUSG00000108258 | Chr6:148,915,215-148,920,535  | Scinhaf, Dennd5b, Etfbkmt, Amn1, Resf1, Bicd1, Caprin2, Ipo8, Tmtc1, Ergic2, Far2                                                                                                                           |

**Supplementary Table 3. Top 50 differentially expressed lncRNAs and neighbouring genes in Harlequin mice.**

| <i>MGI Symbol</i> | <i>Ensembl ID</i>  | <i>Locus</i>                 | <i>Genes (1,000,000bp)</i>                                                                                                                                                                                                                         |
|-------------------|--------------------|------------------------------|----------------------------------------------------------------------------------------------------------------------------------------------------------------------------------------------------------------------------------------------------|
| Xist              | ENSMUSG00000086503 | chrX:103,460,366-103,483,254 | Zcchc13, Slc6a2, Rlim, Nexmif, Abcb7, Tsx, Cdx4, Nap112, Dmrtc1a, Dmrtc1c2, Dmrtc1b, Phka1                                                                                                                                                         |
| Gm15903           | ENSMUSG00000086916 | chr5:129,727,046-129,728,385 | Psph, Sumf2, Phkg1, Nupr1l, Chchd2, Vkorc1l1, Crpcp, Tpst1, Zbed5, Gusb, Asl, Kctd7, Rabgef1, Tmem248, Sbds, Tyw1, Caln1, Nipsnap2, Mrps17, Sept14, Zfp11, Sfswap, Adrd1, Ran, Stx2, Rimbpb2, Piwil1                                               |
| Gm32171           | ENSMUSG00000111645 | chr9:33151292-33262516       | Ets1, Fli1, Kcnj1, Kcnj5, Arhgap32                                                                                                                                                                                                                 |
| 2410006H16Rik     | ENSMUSG00000086841 | chr11:62602877-62604807      | Lrrc75a, Mmgt2, Zfp287, Trim16, Fbxw10, Tvp23b, Cdr4, Tekt3, Pmp22, Trpv2, Cenpv, Ubb, Pigl, Ncor1, Ncor1, Zswim7, Ttc19, Specc1, Akap10, Ulk2, Prpsap2, Grap, Slc5a10, Fam83g                                                                     |
| 2610035D17Rik     | ENSMUSG00000087259 | chr11:113043895-113201838    | Slc39a11, Sstr2, Cog1, Fam104a, D11Wsu47e, Cpsf4l, Cdc42ep4, Sdk2, Sox9                                                                                                                                                                            |
| Gm15564           | ENSMUSG00000086324 | chr16:35966753-35983230      | KPn1, Wdr5b, Ccdc58, Csta1, Fam162a, Stfa2l1, Cstdc4, Csta3, Csta2, Stfa1, Cstdc6, Stfa2, Stfa3, Casr, Cd86, Ildr1, Slc15a2, Eaf2, Golgb1, Igcb1, Hlcs1, Fbxo40, Parp9, Dtx3l, Parp14, Hspbap1, Slc49a4, Sema5b, Pdia5, Sec22a, Adcy5, Hacd2, Mylk |
| Cep83os           | ENSMUSG00000097164 | chr10:94671025-94688576      | Cep83, Plxnc1, Cradd, Soccs2, Mrp142, Ube2n, Nudt4, Anapc15-ps, Tmcc3, Ndufa12, Nr2c1, Fgd6, Vezt, Metap2, Usp44, Ntn4                                                                                                                             |
| E230013L22Rik     | ENSMUSG00000096957 | chr8:11477929-11480241       | Naxd, Cars2, Ing1, Ankrd10, Arhgef7, Tex29, Sox1, Rab20, Col4a2, Col4a1, Irs2, Myo16                                                                                                                                                               |
| Gm34030           | ENSMUSG00000109697 | chr8:57331692-57334387       | Scrg1, Sap30, Hmgb2, Galnt7, Galnt16, Hand2, Fbxo8, Cep44                                                                                                                                                                                          |

Snhg8                      ENSMUSG00000104960                      chr3:123507552-123508404                      Ndst3, Tram111, Prss12, Mettl14, Sec24d, Synpo2, Myoz2, Usp53, Fabp2, Pde5a, Fnbp1l

4933404O12Rik                      ENSMUSG00000097908                      chr5:136919401-136937112                      Fis1, Cldn15, Znhit1, Plod3, Vgf, Ap1s1, Serpine1, Trim56, Muc3, Muc3a, Ache, Ufsp1, Srrt, Trip6, Slc12a9, Ephb4, Xan, Epo, Pop7, Gigyf1, Gnb2, Actl6b, Tfr2, Mospd3, Fbxo24, Pcolce, Sap25, Lrch4, Irs3, Agfg2, Tsc22d4, Nyap1, Ppp1r35, Tsc22d4, Mepce, Zcwpw1, Pplr1, Pplr1, Pplr1, Ift22, Col26a1, Myl10, Cux1, Sh2b2, Prkrip1, Ora1, Polr2j, Rasa4, Lrdw1, Alkbh4, Upk3bl, Dtx2, Zp3, Ssc4d

Gm17017                      ENSMUSG00000090246                      chr1:85641222-85650585                      Sp100, Cab39, Itm2c, Spata3, Gpr55, Psm1, Htr2b, Armc9, B3gnt7, Nc1, Nmur1, TEx44, Ptma, Pde6d, Cops7b, Sp140, Sp110, Slc16a14, Fbxo36, Trip12, Dner

Gm7292                      ENSMUSG00000104222                      chr6:117716342-117718868                      Zfp637, Zfp239, Hnrnpf, Fxyd4, RAsgef1a, Csgalnact2, Ret, Bms1, Zfp248, Zfp9, Ankrd26, Cacna1c, Cxcl12

Gm20632                      ENSMUSG00000093577                      chr3:96239393-96241819                      H3c15, H2ac19, H2ac18, H3c14, H4c14, H2bc18, Fcgr1, H3c13, BC107364, Hfv, Txnip, Polgr3gl, Ankrd34a, Rbm8a, Pex11b, Itga10, Ankrd35, Nudt17, Polr3c, Pias3, Rnf115, Cdc60, Pdck1, Gpr89, Gja5, Gja8, Acp6, Bc19, H2ac20, H2ac21, Bola1, Sv2a, Otud7b, Mtmr11, Sf3b4, Otud7b, Vps45, Plekho1, Anp32a, Mrps21, Prpf3, Ciart, Aph1a, Car14, BC028528, Rprd2, Ecm1, Tars2, Ensa, Mcl1, ADamts14, Golph3l, Hormad1, Ctss, Ctsk, Arnt, Setdb1, Cers2, Anxa9, Mindy1, Prun1

Gm16685                      ENSMUSG00000097804                      chr3:7612705-7690001                      Stmn2, Hey1, Il7, Zc2hc1a, Pkia

|         |                    |                         |                                                                                                                                                                                                                |
|---------|--------------------|-------------------------|----------------------------------------------------------------------------------------------------------------------------------------------------------------------------------------------------------------|
| Gm38534 | ENSMUSG00000108634 | chr11:88253368-88256990 | Ccdc182, Msi2, Akap1, Scep1, Elob1, Coil, TRim25, Dgke, Mrps23, Cuedc1, Vezf1, Srsf1, Dynll2, Olfr464, Olfr462, Olfr463, Epx, Mks1, Lpo, Mpo, Tspoap1, Supt4a, Rnf43, Hsf5, Mtmr4, Sept4, Tex14, Rad51c, Ppm1e |
|---------|--------------------|-------------------------|----------------------------------------------------------------------------------------------------------------------------------------------------------------------------------------------------------------|

|               |                    |                         |                                                                                                                  |
|---------------|--------------------|-------------------------|------------------------------------------------------------------------------------------------------------------|
| 2310015D24Rik | ENSMUSG00000099411 | chr16:13514131-13520419 | Parn, Bfar, Pla2g10, Rrn3, Ntan1, Pdxdc1, Mpv17l, Ofitm7, Bmerb1, Marf1, Nde1, Myh11, Fopnl, Abcc1, Mrtfb, ERcc4 |
|---------------|--------------------|-------------------------|------------------------------------------------------------------------------------------------------------------|

|      |                    |                         |                                                                                                                                                        |
|------|--------------------|-------------------------|--------------------------------------------------------------------------------------------------------------------------------------------------------|
| Eprn | ENSMUSG00000113346 | chr13:73344665-73347384 | Lpcat1, Slc6a3, Clptm1, Slc6a18, Tert, Slc12a7, Nkd2, Trip13, Brd9, Zdhhc11, Tppp, Cep72, Slc9a3, Exoc3, Ahrr, Pdcd6, Dsha, Mrp136, Ndufs6, Irx4, Irx2 |
|------|--------------------|-------------------------|--------------------------------------------------------------------------------------------------------------------------------------------------------|

|         |                    |                           |                                            |
|---------|--------------------|---------------------------|--------------------------------------------|
| Gm47101 | ENSMUSG00000112073 | chr10:102435269-102435543 | Nts, Rassf9, Alx1, Lrriq1, Slc6a15, Mgat4c |
|---------|--------------------|---------------------------|--------------------------------------------|

|               |                    |                          |                                                                                                                                                                                                                                                                                        |
|---------------|--------------------|--------------------------|----------------------------------------------------------------------------------------------------------------------------------------------------------------------------------------------------------------------------------------------------------------------------------------|
| 2900097C17Rik | ENSMUSG00000102869 | chr2:156388065-156392979 | Epb4l1, Aar2, Dlgap4, Tgif2, Rab5if, Sla2, Ndr3, Dsn1, Soga1, Tldc2, Samhd1, Rbl1, Mroh8, Rpn2, Ghrh, Cnbd2, Scand1, Phf20, Romo1, Rbm39, Rbm12, Nsf1, Cpne1, Spag4, ERgic3, Fer1l4, Gdf5, Cep250, Uqcc1, Eif6, Mmp24, Edem2, Procr, BC029722, Gss, Acss2, Myh7b, Trpc4ap, Ggt7, Ncoa6 |
|---------------|--------------------|--------------------------|----------------------------------------------------------------------------------------------------------------------------------------------------------------------------------------------------------------------------------------------------------------------------------------|

|        |                    |                         |                                                                                                                                                                                                                                             |
|--------|--------------------|-------------------------|---------------------------------------------------------------------------------------------------------------------------------------------------------------------------------------------------------------------------------------------|
| Gm7125 | ENSMUSG00000069996 | chr11:51898966-51909624 | Ube2b, Cdkn2aipnl, Cdk13m Ppp2ca, Olfr1373, Skp1a, Olfr1371, Skp1a, Tcf7, Vdac1, Jade2, Sar1b, Sec24a, N4bp3, Rmnd5b, Nhp2, Hnrnpab, Phypk1, Col23a1, Clk4, BC049762, Zfp354a, Olfr51, Olfr54, Olfr1375, Olfr1377, Olfr1378, Prop1, Zfp354b |
|--------|--------------------|-------------------------|---------------------------------------------------------------------------------------------------------------------------------------------------------------------------------------------------------------------------------------------|

|               |                    |                          |                                                                                                                                                                                                                                                                                  |
|---------------|--------------------|--------------------------|----------------------------------------------------------------------------------------------------------------------------------------------------------------------------------------------------------------------------------------------------------------------------------|
| Gm39822       | ENSMUSG00000110618 | chr11:51898966-51909624  | Cdkn2aipn1, Ube2b, Cdkl3, Ppp2ca, Olfr1373, Olfr1371, Skp1a, Tcf7, Vdac1, Jade2, Sar1b, Sec24a, N4bp3, Rmnd5b, Nnp2, Hnnpab, Phypk1, Col23a1, Clk4, BC049762, Zfp354a, Olfr1375, Olfr54, Olfr51, Olfr1377, Olfr1378, Prop1, Zfp354b, Zfp2                                        |
| 4632404M16Rik | ENSMUSG00000106296 | chr3:102134615-102137496 | Vangl1, Ngf, Tspan2, Tshb, Sycp1, Nr1h5, Sike1, Csde1, Nras, Ampd1, Casq2, Nhh2, Slc22a15, Mab21l3, Atp1a1, Igsf3, Cd2                                                                                                                                                           |
| Zbtb11os1     | ENSMUSG00000102101 | chr16:55973268-55974617  | Zbtb11, Pcnp, Trmt10c, Senp7, Impg2, Ani3bp, Tfg, Adgrg7, Tmem45a, Lnp1, Rp124, Cep97, Nxe3, Nfkbiz, Zpld1                                                                                                                                                                       |
| Gm35021       | ENSMUSG00000109714 | chr8:35724382-35734768   | Cldn23, Prag1, Lonrf1, Trmt9b, Dlc1, Mfhas1, Eri1, Ppp1r3b, Tnks, Dusp4                                                                                                                                                                                                          |
| Gm46218       | ENSMUSG00000110830 | chr10:29297934-29313825  | Echdc1, Rnf146, Rspo3, Cenpw, Soga3, Themis, Ptprk                                                                                                                                                                                                                               |
| D830013O20Rik | ENSMUSG00000056359 | chr12:73364075-73409557  | Tmem30b, Prkch, Hif1a, Snapc1, Syt16, Trmt5, Slc38a6, Mnat1, Six4, Six1, Six6, Ppm1a, Dhrr7, Pcnx4, Lrrc9                                                                                                                                                                        |
| Shhg1         | ENSMUSG00000108414 | chr19:8723475-8726443    | Wdr74, Stx5a, Nxf1, Tmem223, Tmem179b, Taf6l, Polr2g, Ttc9c, Hnnpul2, Lrrn4cl, Zbtb3, Bsc12, Ubxn1, Lbhd1, Ints5, Ganab, B3gat3, Gng3, Uqcc3, Rom1, Em13, Mta2, Eef1g, Ahnak, Scgb1a1, Asrgl1, Chrm1, Slc3a2, Slc22a8, Slc22a6, Slc22a30, Slc22a29, Slc22a28, Slc22a27, Slc22a26 |
| Dubr          | ENSMUSG00000022639 | chr16:50719294-50732773  | Ccdc54, Bbx, Cd47, Ift57                                                                                                                                                                                                                                                         |
| Rmst          | ENSMUSG00000112117 | chr10:92075123-92075629  | Nedd1, Cfp54, Tmpo, Slc25a3, Ikbip                                                                                                                                                                                                                                               |

|          |                    |                          |                                                                                                                                                                                                                                                                                                                                                 |
|----------|--------------------|--------------------------|-------------------------------------------------------------------------------------------------------------------------------------------------------------------------------------------------------------------------------------------------------------------------------------------------------------------------------------------------|
| AI480526 | ENSMUSG00000090086 | chr5:123134843-123141666 | Setd1b, Hpd, Psm9, Wdr66, Bc17a, Mlixip, Ii31, Lrrc43, B3gnt4, Diablo, Vps33a, Clip1, Zcchc8, Rsrc2, Kntc1, Hcar2, Hcar1, Denr, Ccdc62, Hip1r, Vps37b, Abcb9, Ogfod2, Arl6ip4, Rhof, Tmem120b, Morn3, Orai1, Kdm2b, Rnf34, Anapc5, Camkk2, P2rx4, P2rx7, Ift81, Atp2a2, Anapc7, Arpc3, Fam216a, Vps29, Gph3, Rad9b, Pptc7, Tctn1, Hvcn1, Ppp1cc |
|----------|--------------------|--------------------------|-------------------------------------------------------------------------------------------------------------------------------------------------------------------------------------------------------------------------------------------------------------------------------------------------------------------------------------------------|

|         |                    |                        |                                                                                                                                                                                                                                                                                                                                                                                                                                                |
|---------|--------------------|------------------------|------------------------------------------------------------------------------------------------------------------------------------------------------------------------------------------------------------------------------------------------------------------------------------------------------------------------------------------------------------------------------------------------------------------------------------------------|
| Gm20633 | ENSMUSG00000093553 | chr3:96243550-96246380 | H2ac18, h3c14, H4ac14, H2bc18, H3c13, Fcgr1, BC107364, Hvj, Txnip, Polr3gl, Ankrd34a, Rbm8a, Pex11b, Itga10, Lic1l, Ankrd35, Nudt17, Polr3c, Pias3, Rnf115, Cd160, Pdzk1, Gpr89, Gja8, Gja5, Acp6, Bc19, H2ac19, H3c15, H2bc21, H2ac20, H2ac21, Bola1, Otud7b, Mtmr11, Sf3b4, Vps45, Plekho1, Anp32e, Aph1a, Car14, Prpf3, Mrps21, Rprd2, Tars2, Ecm1, Ensa, Mcl1, Adamts14, Golph3l, Hormad1, Ctss, Ctsk, Arnt, Setdb1, Anxa9, Mindy1, Prune1 |
|---------|--------------------|------------------------|------------------------------------------------------------------------------------------------------------------------------------------------------------------------------------------------------------------------------------------------------------------------------------------------------------------------------------------------------------------------------------------------------------------------------------------------|

|               |                    |                         |                                             |
|---------------|--------------------|-------------------------|---------------------------------------------|
| 1700030C10Rik | ENSMUSG00000099759 | chr12:20804381-20815779 | Asap2, Utgb1bp1, Cpsf3, Iah1, Adam17, Ywhaq |
|---------------|--------------------|-------------------------|---------------------------------------------|

|        |                    |                           |                                                                     |
|--------|--------------------|---------------------------|---------------------------------------------------------------------|
| Zswim6 | ENSMUSG00000032846 | chr13:107724618-107890064 | Smim15, Ndudaf2, ERcc8, Elovl7, Depdc1b, Pde4d, Kif2a, Dimt1, Ipo11 |
|--------|--------------------|---------------------------|---------------------------------------------------------------------|



|               |                    |                          |                                                                                                                                                                                                                                                                                                                                                       |
|---------------|--------------------|--------------------------|-------------------------------------------------------------------------------------------------------------------------------------------------------------------------------------------------------------------------------------------------------------------------------------------------------------------------------------------------------|
| E330017L17Rik | ENSMUSG00000086369 | chr4:129906433-129919787 | Spocd1, Adgrb2, Col16a1, Pef1, Hcrtr1, Tinagl1, Serinc2, Ldc1, Fabp3, Zcchc17, Snrnp40, Nkain1, Pum1, Sdc3, Ptp4a2, Khdrbs1, Tmem39b, Kpna6, Txlna, Iqcc, Ccdc28b, Tmem234, Dcdc2b, Eif3i, Lck, Fam167b, Hdac1, Marcksl1, Fam229a, Tssk3, Bsdc1, Zbtb8b, Zbtb8a, Zbtb8os, Rbbp4, Sync, C77080, Yars, S100ppb, Fndc5, Hpca, Rnf19b, Tmem54, Ak2, Azin2 |
|---------------|--------------------|--------------------------|-------------------------------------------------------------------------------------------------------------------------------------------------------------------------------------------------------------------------------------------------------------------------------------------------------------------------------------------------------|

|         |                    |                          |                                                                                                                                  |
|---------|--------------------|--------------------------|----------------------------------------------------------------------------------------------------------------------------------|
| Gm43244 | ENSMUSG00000105342 | chr3:102129938-102131222 | Vangl1, Ngf, Tspan2, Tshb, Sycp1, Nr1h5, Sike1, Csde1, Nras, Ampd1, Dennd2c, Casq2, Nhlh2, Slc22a15, Mab21l3, Atp1a1, Igsf3, Cd2 |
|---------|--------------------|--------------------------|----------------------------------------------------------------------------------------------------------------------------------|

|          |                    |                          |                                                                                                                                                                                                                                                                             |
|----------|--------------------|--------------------------|-----------------------------------------------------------------------------------------------------------------------------------------------------------------------------------------------------------------------------------------------------------------------------|
| Kcnq1ot1 | ENSMUSG00000101609 | chr7:143203458-143296549 | Cdkn1c, Slc22a18, Phlda2, Nap114, Cars, Tnfrsf22, Tnfrsf23, Tnfrsf26, Osbp15, Mrgprg, Mrgpre, Nadsyn, Dhcr7, Acte1, Shank2, Kcnq1, Trpm5, Tssc4, Tspan32, Cd81, Ascl2, Th, Ins2, Igf2, Mrp123, Tnnt3, Lsp1, Prr33, Tnni2, Syt8, Ctsd, Ifitm10, Krtap5-4, Krtap5-1, Krtap5-5 |
|----------|--------------------|--------------------------|-----------------------------------------------------------------------------------------------------------------------------------------------------------------------------------------------------------------------------------------------------------------------------|

|         |                    |                          |                                                                                              |
|---------|--------------------|--------------------------|----------------------------------------------------------------------------------------------|
| Gm13166 | ENSMUSG00000085525 | chr4:146251829-146253858 | Zfp992, Zfp981, Zfp993, Zfp989, Rex2, Zfp991, Zfp600, Zfp987, Zfp986, Zfp980, Zfp990, Tnfrs8 |
|---------|--------------------|--------------------------|----------------------------------------------------------------------------------------------|

|         |                    |                           |                                                                                                                                                                                                                                                                                                    |
|---------|--------------------|---------------------------|----------------------------------------------------------------------------------------------------------------------------------------------------------------------------------------------------------------------------------------------------------------------------------------------------|
| Gm28875 | ENSMUSG00000100975 | chr12:104925501-104926689 | Syne3, Glrx5, Tcl1b2, Tcl1b1, Tcl1b5, Tcl1b4, Tcl1b3, Tcl1, Tunar, Bdkrb2, Bdkrb1, Atg2b, Gskip, Ak7, Papola, Clmn, Dicer1, Gsc, Serpina3n, Serpina3m, Serpina3j, Serpina3k, Serpina3i, Serpina3g, Serpina3f, Serpina3c, Serpina3b, Serpina3a, Serpina5, Serpina12, Serpina9, Serpina11, Serpina1e |
|---------|--------------------|---------------------------|----------------------------------------------------------------------------------------------------------------------------------------------------------------------------------------------------------------------------------------------------------------------------------------------------|

|               |                    |                         |                                                                                                                                                                                                                                                                          |
|---------------|--------------------|-------------------------|--------------------------------------------------------------------------------------------------------------------------------------------------------------------------------------------------------------------------------------------------------------------------|
| 2410022M11Rik | ENSMUSG00000100017 | chr14:56811989-56813899 | Zmym2, Gja3, Gjb2, Gjb6, Cryl1, lft88, Eef1akmt1, Il17d, Xpo4, Lats2, Sap18, Zmym5, Pspc1, Mphosph8, Parp4, Cenpj, Rnf17, Atp12a, Gzmb, Gzmc, Gzmf, Gzmg, Gzmn, Gzmd, Gzme, Ctsg, Mcft8, Mcpt4, Mcpt2, Mcpt9, Mcpt1, , Cma2, Cma1, Sdr39u1, Khnyn, Cbln3, Nynrin, Nfatc4 |
|---------------|--------------------|-------------------------|--------------------------------------------------------------------------------------------------------------------------------------------------------------------------------------------------------------------------------------------------------------------------|

|         |                    |                        |       |
|---------|--------------------|------------------------|-------|
| Gm26795 | ENSMUSG00000097776 | chr8:28593505-28595599 | Unc5d |
|---------|--------------------|------------------------|-------|

|               |                    |                         |                                                   |
|---------------|--------------------|-------------------------|---------------------------------------------------|
| A930029G22Rik | ENSMUSG00000096988 | chr17:69416660-69439304 | Akain1, Dlgap1, Zbtb14, Epb413, Tmem200c, L3mbtl4 |
|---------------|--------------------|-------------------------|---------------------------------------------------|

|        |                    |                          |                                                                                                                                                                                                                                                            |
|--------|--------------------|--------------------------|------------------------------------------------------------------------------------------------------------------------------------------------------------------------------------------------------------------------------------------------------------|
| Snhg12 | ENSMUSG00000086290 | chr4:132308678-132311024 | Trnau1ap, Phactr4, Rxr1, Med18, Sesn2, Atpif1, Ptafr, Dnajc8, Eya3, Xkr8, Smpdl3b, Rpa2, Themis2, Ppp1r8, Stx12, Fam76a, Fgr, Ahdc1, Wasf2, Gpr3, Cd164l2, Map3k6, Sytl1, Tmem222, Rab42, Taf12, Gmeb1, Ythdf2, Oprd1, Epb41, Tmem200b, Srsf4, Mecr, Ptbru |
|--------|--------------------|--------------------------|------------------------------------------------------------------------------------------------------------------------------------------------------------------------------------------------------------------------------------------------------------|

|        |                    |                          |                                                                                                                                |
|--------|--------------------|--------------------------|--------------------------------------------------------------------------------------------------------------------------------|
| Gm5532 | ENSMUSG00000073535 | chr1:155520173-155527111 | Acbd6, Lhx4, Qsox1, Cep350, Tor1aip1, Tor1aip2, Fam163a, Tdrd5, Mphs2, Axdnd1, Soat1, Xpr1, BC034090, Stx9, Mr1, Oer5, Cacna1e |
|--------|--------------------|--------------------------|--------------------------------------------------------------------------------------------------------------------------------|

Gm17251

ENSMUSG00000090952

chr17:33759992-33761870

Angptl4, Kank3, Rps28, Kifc1, Ndufa7, Smim40-ps, Cd320, Smim40, Daxx, Zbtb22, Tapbp, B3galt4, Rps18, Vps52, Rgl2, Pfdn6, WDr46, H2-K1, Ring1, Rxrb, H2-Ke6, Slc39a7, Col11a2, Brd2, H2-Dma, H2-DMb2, H2-DMb1, Psm9, Tap1, Psmb8, H2-Ob, Tap2, H2-Ab1, H2-Aa, H2-Ea-ps, Btnl2, H2-Eb1, H2-Eb2, Btnl1, BC051142, Btn14, Btn16, Notch4, Gpsm3, Ppt2, Pbx2, Ager, Rnf5, Agpat1, Egf18, Prt1, Fkbp1, Atf6b, Tnxb, C4b, Rab11b, March2, Rab11b, Hnrnpm, Zfp414, Pram1, Myo1f, ADamts10, Act19, Zfp101, Zfp955b, Olfr63, Zfp955a, Olfr1564, Olfr239, Olfr55, Morc2b, Zfp563, Zfp763, Zfp952, , Zfp472, Cyp4f13, Cyp4f14, Zfp870, Zfp799, Zfp811, Zfp871

Ifi30

ENSMUSG00000031838

chr8:70762774-70766663

Pik3r2, Mast3, Ili2rb1, Arrdc2, Kcnn1, Slc5a5, Rpli8a, Map1s, Rpli8a, Ccdc124, Haus8, Myo9b, Use1, Ocel1, Nr2f6, Ushbp1, Babam1, Ankle1, dda1, Ano8, Gtpbp3, Plvap, Ccdc194, Bst2, Mvb12a, Tmem221, Nxn1, Slc27a1, Fam129c, Colgalt1, Pgl3, Unc13a, Jak3, Insl3, B3gnt3, Fcho1, Mpv17l2, Rab3a, Pde4c, Lsm4, Gm3336, Pgpep1, Pde4c, Iqcn, Jund, Ssbp4, Gdf15, Lrrc25, Isyna, Fkbp8, Kxd1, uba52, REX1bd, Tmem59l, Crif1, Kihl26, Crtc1, Comp, Upf1, Gdf1, Cers1, Cope, Ddx49, Sugg2, Homer3, Armc6, Slc25a42, Tmem161a, Mef2b, Borcs8, Rfxank, Nr2c2ap, Ncan, Hapln4, Tm6sf2, Sugg1, Mau2, Gatad2a, Tssk6, Cilp2, Pbx4, Yjefn3, Ndufa13, Gatad2a, Atp13a1, Gmip, Lpar2

Gm47547

ENSMUSG00000114196

chr14:41053653-41061614

Mat1a, Mbl1, Sftpd, Sftpd1, Gm2832,  
Gm5798, Gm7945, Gm6482, Gm7954,  
Gm3486, Gm7970, Gm3072, Gm3676,  
Gm8068, Gm7929, Gm47189, Gm7980,  
Gm6401, Gm3543, Dydc1, dydc2, Prxl2a,  
Tspan14, Sh2d4b

Gm20300

ENSMUSG00000111080

chr10:30603195-30606634

Hint3, Ncoa7, Hey2, Hddc2, Tpd5211,  
Rnf217, Trmt11, Cenpw

Gm47469

ENSMUSG00000113047

chr13:74553910-74556948

Erap1, Cast, Pcsk1, Zfp825, Ftl1-ps1,  
Zfp72, Lrrc14b, Ccdc127, Sdha, Pcd6,  
Ahr, Exoc3, Slc9a3, Cep72, Tppp,  
Zdhc11, Brd9, Trip13, Nkd2, Slc12a7,  
Slc6a19, Slc6a18, Tert, Clptm1l
